# Supplementary material for: Syngeneic tobacco carcinogen–induced mouse lung adenocarcinoma model exhibits PD-L1 expression and high tumor mutational burden
Source: JCI journal article supplement (doi:10.1172/jci.insight.145307), 2020-12-22
Supplement: sd1 [file 1]

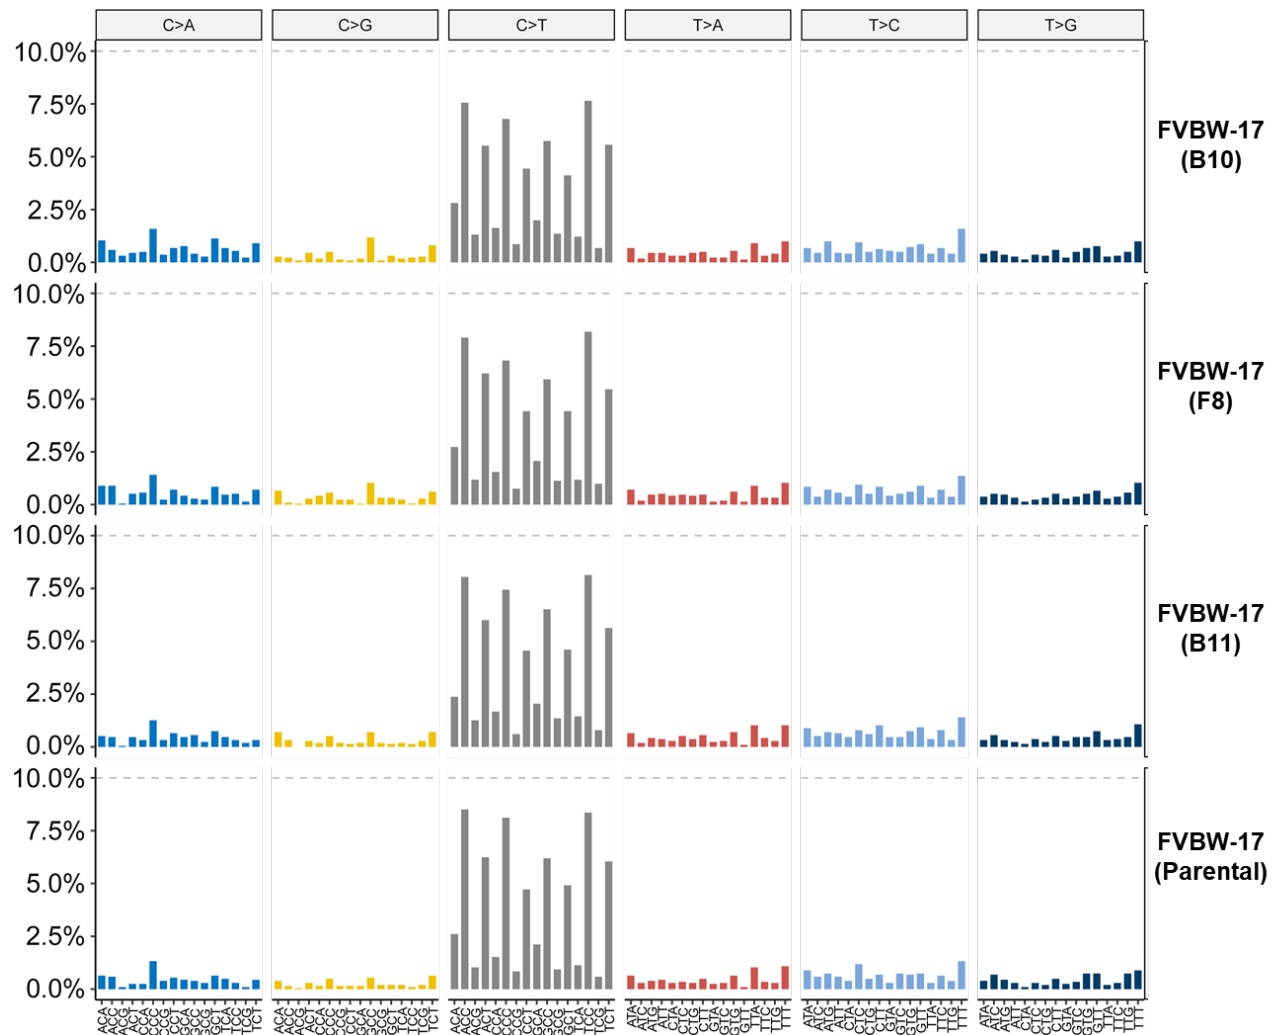

**Figure S1. Mutation signature of all FVBW-17 cell lines associated with alkylating agents using a 96-substitution classification.** FVBW-17 is the parental strain, and the other three are clonal cell lines.

**Table S1. Number of mice and frequency of distant metastases of FVBW-17 cells from s.c. tumors.**

|                      | <b>Lung</b> | <b>Spleen</b> | <b>Kidney</b> | <b>Liver</b> |
|----------------------|-------------|---------------|---------------|--------------|
| <b>Male (n=15)</b>   | 9 (60%)     | 3 (20%)       | 3 (20%)       | 2 (13%)      |
| <b>Female (n=15)</b> | 11 (73%)    | 4 (27%)       | 2 (13%)       | 2 (13%)      |

**Table S2. Summary statistics of variant filtering steps.**

| Sample      | Raw list of variants | After removing strain-specific polymorphisms (those present in FVB/NJ dbSNP v142) | Variants PASS (removing reads flagged by MuTect2 intrinsic filters in tumor-only mode or by read orientation filter) | Putative somatic variants in coding region (exonic or splicing) | Putative somatic variants predicted to affect protein sequences (a.k.a. non-synonymous somatic mutations, NSSMs) | NSSM single nucleotide variants (SNVs) | NSSM insertions/deletions (indels) |
|-------------|----------------------|-----------------------------------------------------------------------------------|----------------------------------------------------------------------------------------------------------------------|-----------------------------------------------------------------|------------------------------------------------------------------------------------------------------------------|----------------------------------------|------------------------------------|
| FVBW-17     | 176459               | 22316                                                                             | 3307                                                                                                                 | 778                                                             | 506                                                                                                              | 442                                    | 64                                 |
| FVBW-17 B10 | 177689               | 23040                                                                             | 3519                                                                                                                 | 873                                                             | 577                                                                                                              | 504                                    | 73                                 |
| FVBW-17 F8  | 177203               | 22745                                                                             | 3424                                                                                                                 | 832                                                             | 563                                                                                                              | 495                                    | 68                                 |
| FVBW-17 B11 | 177149               | 22803                                                                             | 3414                                                                                                                 | 874                                                             | 579                                                                                                              | 506                                    | 73                                 |
